# Supplementary material for: Statistical reconstruction of daily temperature and sea level pressure in Europe for the severe winter 1788/89
Source: Copernicus journal article supplement (doi:10.5194/cp-18-2545-2022), 2022-12-02
Supplement: Supplementary file 1 [file cp-18-2545-2022-supplement.zip]

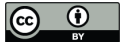

## *Supplement of*

# **Statistical reconstruction of daily temperature and sea level pressure in Europe for the severe winter 1788/89**

**Duncan Pappert et al.**

*Correspondence to:* Stefan Brönnimann ([stefan.broennimann@giub.unibe.ch](mailto:stefan.broennimann@giub.unibe.ch))

- [cp-18-2545-2022-supplement-title-page.pdf](#)
- [Code.zip](#)
- [Observations.zip](#)
- [readme\\_supplement.txt](#)
- [slp\\_EnKF\\_1788-11-01-1789-02-28\\_localized\\_1500km\\_3000m.nc](#)
- [temp\\_EnKF\\_1788-11-01-1789-02-28\\_localized\\_750km\\_1000m.nc](#)

The copyright of individual parts of the supplement might differ from the article licence.
